# Supplementary material for: Performance of palladium and platinum supported on alumina pillared clays in the catalytic combustion of propene
Source: Royal Society of Chemistry journal article supplement (doi:10.1039/c5ra15675k), 2015-01-01
Supplement: c5ra15675k1.pdf [file c5ra15675k1.pdf]

## Supporting Information

### **Performance of palladium and platinum supported on alumina pillared clays in the catalytic combustion of propene**

A. Aznárez, A. Gil\*, S.A. Korili

*Department of Applied Chemistry, Building Los Acebos, Public University of Navarra,  
Campus of Arrosadia, E-31006 Pamplona, Spain*

**Table S1.** Textural properties derived from N<sub>2</sub> adsorption at -196°C and CO<sub>2</sub> adsorption at 0°C.

| Catalyst | S <sub>Lang</sub> <sup>1</sup><br>(m <sup>2</sup> /g) | S <sub>ext</sub> <sup>2</sup><br>(m <sup>2</sup> /g) | S <sub>μp</sub> (N <sub>2</sub> ) <sup>3</sup><br>(m <sup>2</sup> /g) | V <sub>p</sub> <sup>4</sup><br>(cm <sup>3</sup> /g) | V <sub>μp</sub> (N <sub>2</sub> ) <sup>5</sup><br>(cm <sup>3</sup> /g) | V <sub>μp</sub> (CO <sub>2</sub> ) <sup>5</sup><br>(cm <sup>3</sup> /g) | V <sub>mp</sub> (N <sub>2</sub> ) <sup>6</sup><br>(cm <sup>3</sup> /g) |
|----------|-------------------------------------------------------|------------------------------------------------------|-----------------------------------------------------------------------|-----------------------------------------------------|------------------------------------------------------------------------|-------------------------------------------------------------------------|------------------------------------------------------------------------|
| Al-PILC  | 212                                                   | 13                                                   | 199                                                                   | 0.113                                               | 0.080                                                                  | 0.054                                                                   | 0.033                                                                  |
| 0.1Pd    | 162                                                   | 10                                                   | 152                                                                   | 0.086                                               | 0.061                                                                  | 0.055                                                                   | 0.025                                                                  |
| 0.5Pd    | 168                                                   | 10                                                   | 158                                                                   | 0.090                                               | 0.063                                                                  | 0.054                                                                   | 0.027                                                                  |
| 1Pd      | 156                                                   | 11                                                   | 145                                                                   | 0.085                                               | 0.059                                                                  | 0.052                                                                   | 0.026                                                                  |
| 2Pd      | 151                                                   | 11                                                   | 140                                                                   | 0.066                                               | 0.057                                                                  | 0.050                                                                   | 0.009                                                                  |
| 0.1Pt    | 150                                                   | 11                                                   | 139                                                                   | 0.083                                               | 0.056                                                                  | 0.055                                                                   | 0.027                                                                  |
| 0.5Pt    | 150                                                   | 13                                                   | 137                                                                   | 0.087                                               | 0.057                                                                  | 0.054                                                                   | 0.030                                                                  |
| 1Pt      | 128                                                   | 12                                                   | 116                                                                   | 0.076                                               | 0.048                                                                  | 0.051                                                                   | 0.028                                                                  |
| 2Pt      | 74                                                    | 9                                                    | 65                                                                    | 0.050                                               | 0.028                                                                  | 0.053                                                                   | 0.022                                                                  |

<sup>1</sup> Specific surface area calculated using the Langmuir equation ( $0.01 < p/p^0 < 0.05$ ), <sup>2</sup> Specific external surface area obtained from the *t*-plot method, <sup>3</sup> Specific micropore surface area, <sup>4</sup> Specific total pore volume at a  $p/p^0$  of 0.99, <sup>5</sup> Specific micropore volume derived from the Dubinin-Radushkevich (DR) equation, <sup>6</sup> Specific mesopore volume.

**Table S2.** Chemical and metal properties derived from ammonia adsorption at 70°C and carbon monoxide and hydrogen adsorption at 35°C.

| Catalyst | V(NH <sub>3</sub> ) <sup>1</sup><br>(mmol/g) | D(H <sub>2</sub> ) <sup>2</sup><br>(%) | S <sub>Met</sub> (H <sub>2</sub> ) <sup>3</sup><br>(m <sup>2</sup> /g) | dp(H <sub>2</sub> ) <sup>4</sup><br>(nm) | D(CO) <sup>2</sup><br>(%) | S <sub>Met</sub> (CO) <sup>3</sup><br>(m <sup>2</sup> /g) | dp(CO) <sup>4</sup><br>(nm) | Metal content <sup>5</sup><br>(wt.%) |
|----------|----------------------------------------------|----------------------------------------|------------------------------------------------------------------------|------------------------------------------|---------------------------|-----------------------------------------------------------|-----------------------------|--------------------------------------|
| Na-Mont  | 0.05                                         | --                                     | --                                                                     | --                                       | --                        | --                                                        | --                          | --                                   |
| Al-PILC  | 0.26                                         | --                                     | --                                                                     | --                                       | --                        | --                                                        | --                          | --                                   |
| 0.1Pd    | 0.28                                         | --                                     | --                                                                     | --                                       | 29.7                      | 0.11                                                      | 3.8                         | 0.08                                 |
| 0.5Pd    | 0.28                                         | --                                     | --                                                                     | --                                       | 9.6                       | 0.21                                                      | 11.7                        | 0.50                                 |
| 1Pd      | 0.31                                         | 6.0                                    | 0.28                                                                   | 18.7                                     | 5.6                       | 0.26                                                      | 20.0                        | 1.06                                 |
| 2Pd      | 0.29                                         | 5.3                                    | 0.50                                                                   | 21.1                                     | 4.5                       | 0.41                                                      | 24.9                        | 2.03                                 |
| 0.1Pt    | 0.28                                         | 1.5                                    | 0,004                                                                  | 75.5                                     | 29.9                      | 0.07                                                      | 3.8                         | 0.09                                 |
| 0.5Pt    | 0.26                                         | 12.6                                   | 0.16                                                                   | 9.0                                      | 19.0                      | 0.24                                                      | 6.0                         | 0.49                                 |
| 1Pt      | 0.27                                         | 13.0                                   | 0.33                                                                   | 8.7                                      | 17.6                      | 0.45                                                      | 6.4                         | 0.99                                 |
| 2Pt      | 0.18                                         | 11.8                                   | 0.62                                                                   | 9.6                                      | 12.8                      | 0.67                                                      | 8.8                         | 2.01                                 |

<sup>1</sup> Ammonia adsorption volume, <sup>2</sup> Metal dispersion, <sup>3</sup> Metal surface area, <sup>4</sup> Mean size of the metal particles, <sup>5</sup> Metal content from chemical analyses.

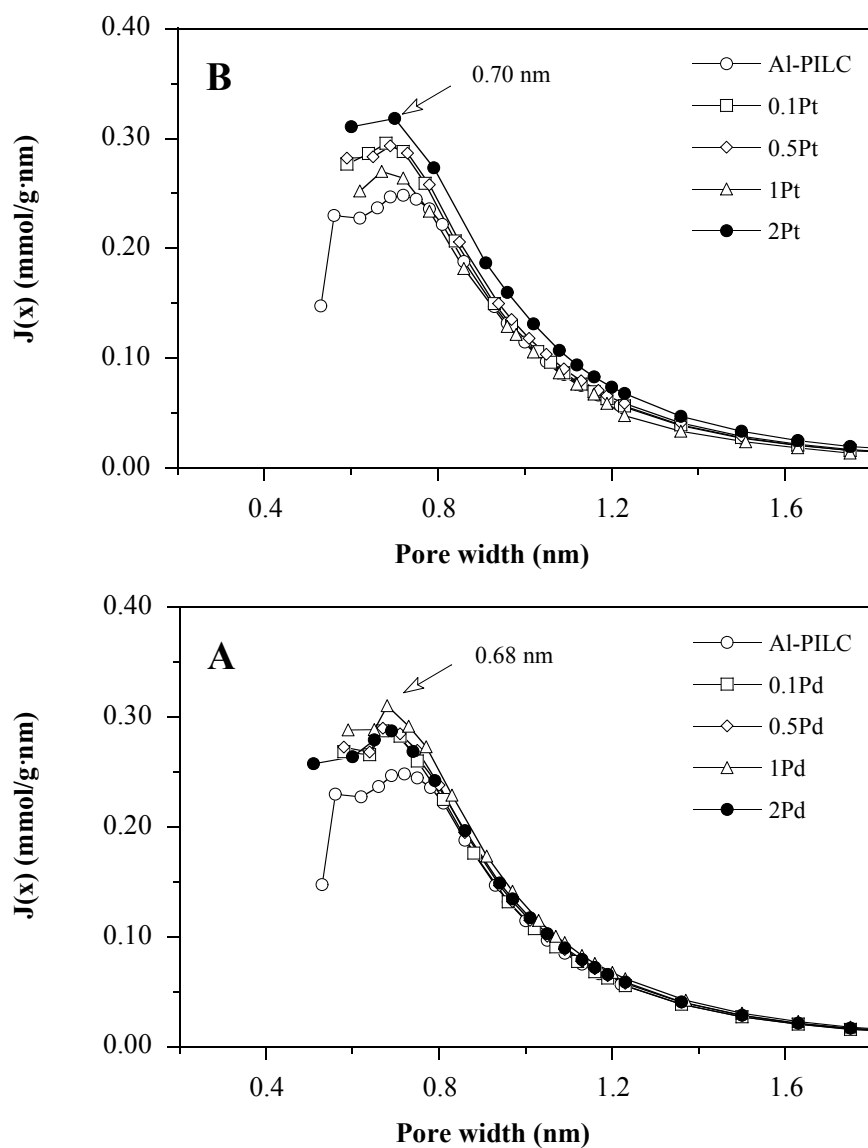

**Figure S1.** Micropore-size distributions (MPSDs) derived from the Jaroniec-Gadkaree-Choma model. (A) Pd/Al-PILCs, (B) Pt/Al-PILCs.

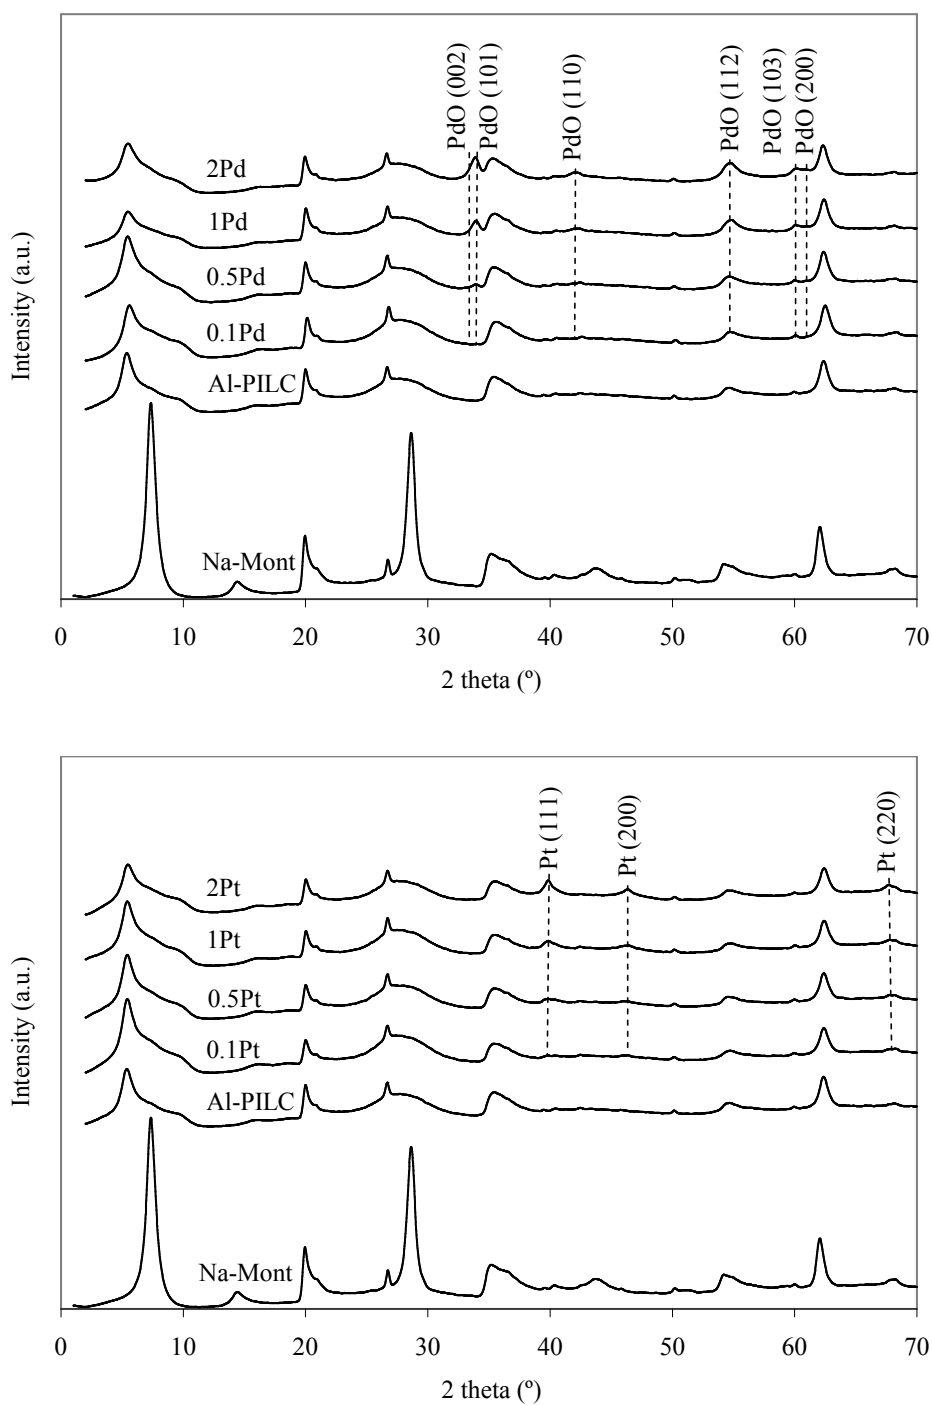

**Figure S2.** XRD patterns of the Pd/Al-PILC and Pt/Al-PILC catalysts.

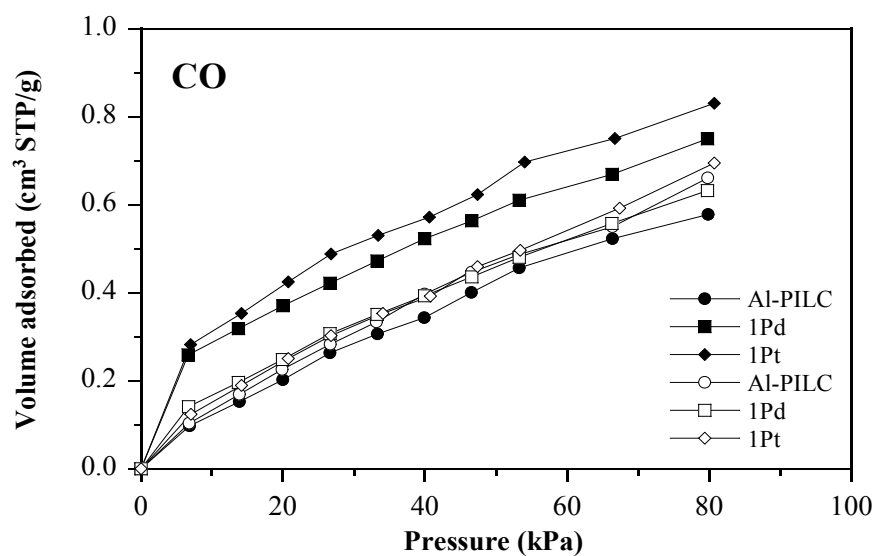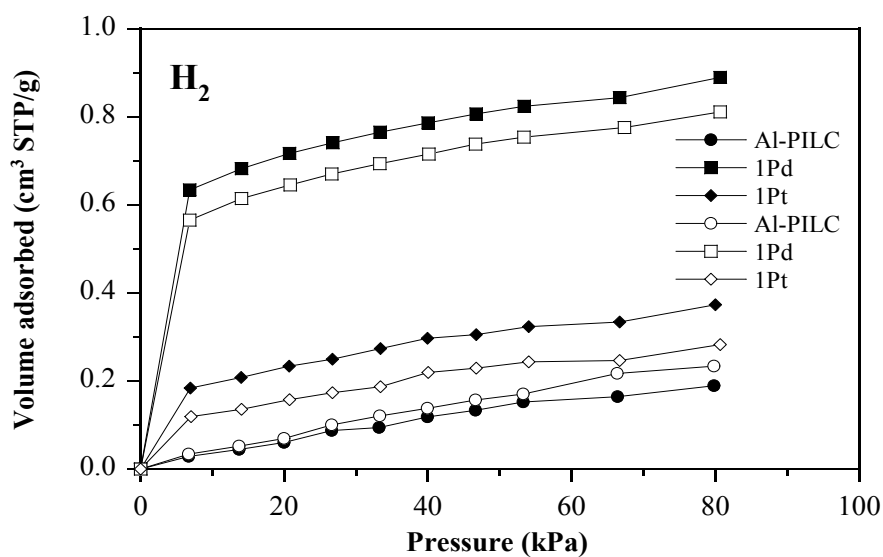

**Figure S3.** Total (●,■,◆) and reversible (○,□,◇) carbon monoxide and hydrogen adsorption at 35°C on selected catalysts and the support, after reduction at 360°C.

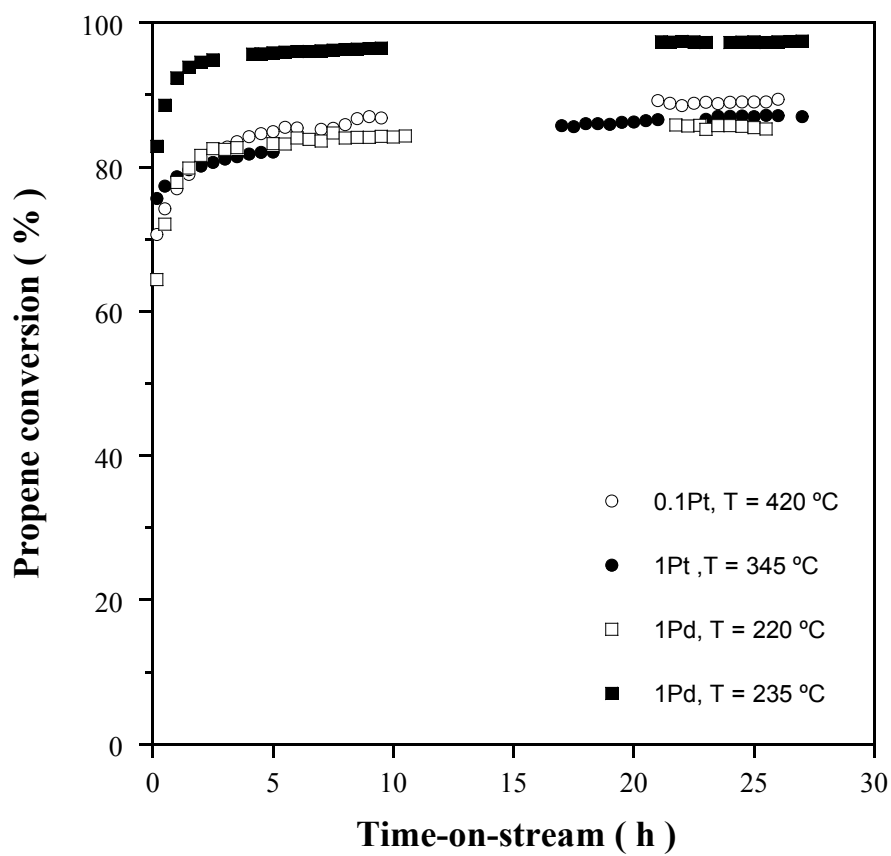

**Figure S4.** Evolution of the conversion of propene at various temperatures with time-on-stream.
